# Supplementary material for: Regulation of sister chromatid cohesion by nuclear PD-L1
Source: PubMed Central journal article supplement (PMC7343880; doi:10.1038/s41422-020-0315-8), 2020-04-29
Supplement: 41422_2020_315_MOESM2_ESM.pdf [file 41422_2020_315_MOESM2_ESM.pdf]

Supplementary Information, Fig. S2.

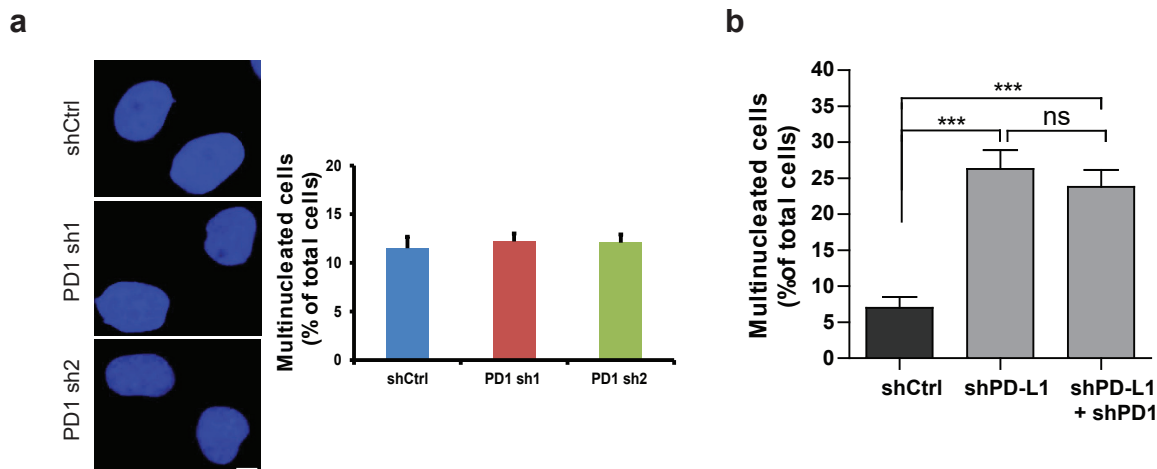

**Supplementary Information, Fig. S2. Loss of PD-L1 but not PD1 induces formation of multinucleated cells.**

(a) Three days after infection with control or PD1 shRNAs, cells were plated on cover slips and fixed. The cell nucleus was visualized by staining with DAPI. Bar: 10  $\mu$ m. Multinucleated cells were quantified.

(b) Quantification of multinucleated cells in cells expressing control shRNA, PD-L1 shRNA, or PD1 shRNA combined with PD-L1 shRNA. Data are presented as mean  $\pm$  s.e.m., and were independently replicated three times with similar results. \*\*\* $P < 0.001$ , ns, not significant, Student's *t*-test.
