# Supplementary material for: Regulation of sister chromatid cohesion by nuclear PD-L1
Source: PubMed Central journal article supplement (PMC7343880; doi:10.1038/s41422-020-0315-8), 2020-04-29
Supplement: 41422_2020_315_MOESM3_ESM.pdf [file 41422_2020_315_MOESM3_ESM.pdf]

Supplementary Information, Fig. S3.

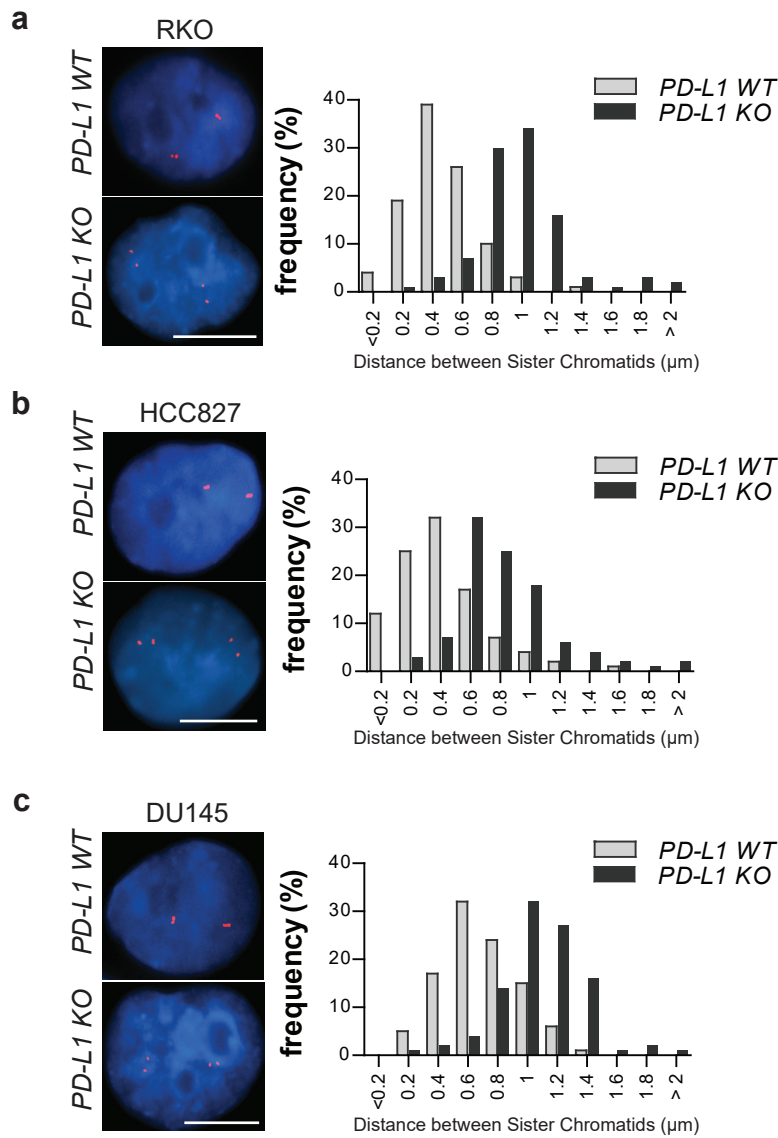

**Supplementary Information, Fig. S3. PD-L1 regulates sister chromatid cohesion in different cancer cell lines.**

(a-c) PD-L1 depletion impairs sister chromatid cohesion. *myb* gene distance between paired FISH signals in wildtype (WT) or *PD-L1* knockout (KO) RKO, HCC837, and DU145 cells. Bar: 10  $\mu\text{m}$ .
