# Supplementary material for: Regulation of sister chromatid cohesion by nuclear PD-L1
Source: PubMed Central journal article supplement (PMC7343880; doi:10.1038/s41422-020-0315-8), 2020-04-29
Supplement: 41422_2020_315_MOESM5_ESM.pdf [file 41422_2020_315_MOESM5_ESM.pdf]

Supplementary Information, Fig. S5.

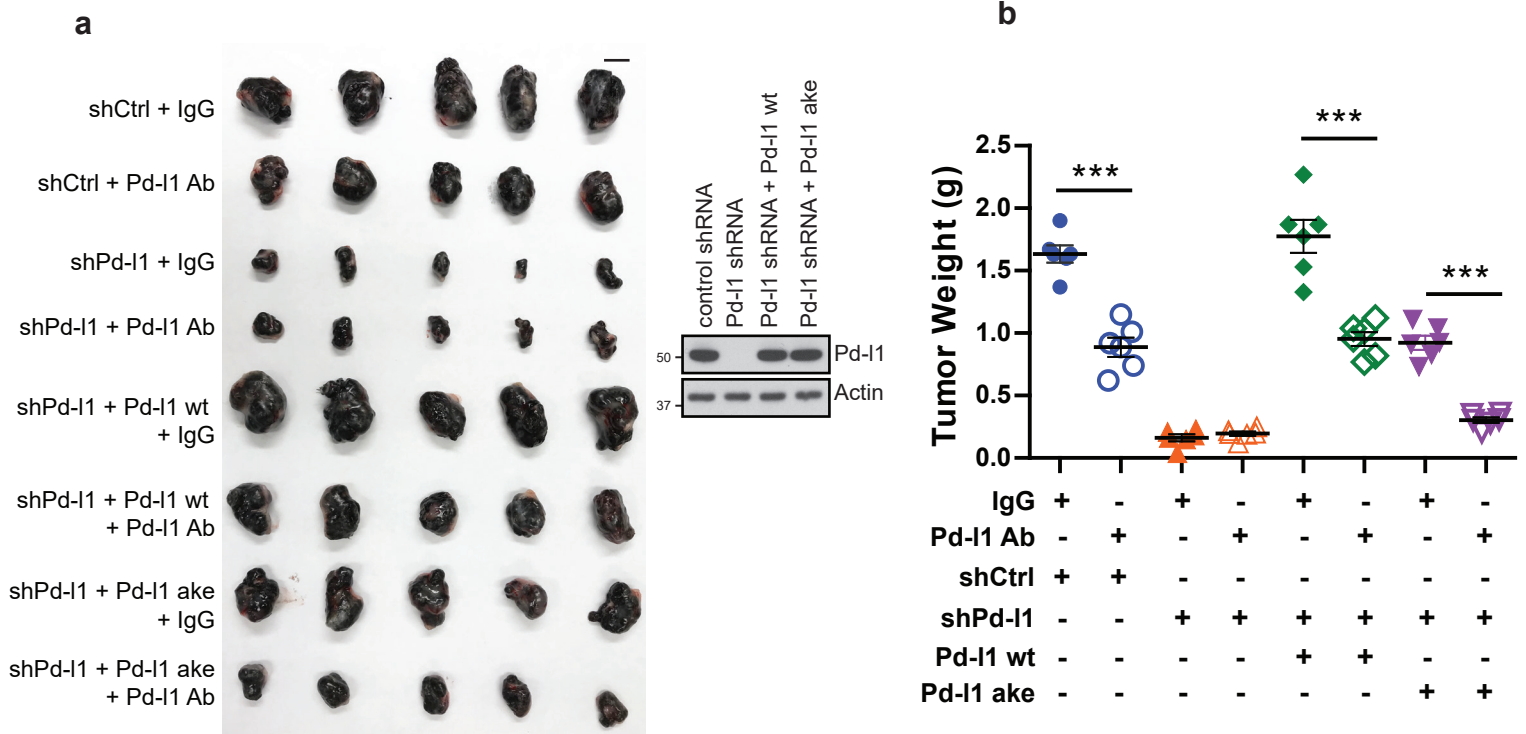

**Supplementary Information, Fig. S5. PD-L1 AKE mutant impairs PD-L1 function in the nucleus while still maintaining its immunosuppressive effect.**

(a-b) B16F10 cells expressing control shRNA (shCtrl), mouse Pd-I1 shRNA (shPd-I1), Pd-I1 shRNA plus shRNA resistant wildtype Pd-I1 (shPd-I1 + Pd-I1 wt), or mouse Pd-I1 shRNA plus shRNA resistant ake mutant Pd-I1 (shPd-I1 kd + Pd-I1 ake) were injected into C57/BL6 mice, and treated with 5 mg/kg mouse Pd-I1 blocking antibody or corresponding IgG. B16F10 xenograft tumors and tumor weight at the time of experiment termination are shown. Data are represented as the mean  $\pm$  s.e.m. Dots depict individual data points. Statistical significance was calculated using Student's *t*-test. \*\*\* $P < 0.001$ .
