# Supplementary material for: Regulation of sister chromatid cohesion by nuclear PD-L1
Source: PubMed Central journal article supplement (PMC7343880; doi:10.1038/s41422-020-0315-8), 2020-04-29
Supplement: 41422_2020_315_MOESM6_ESM.pdf [file 41422_2020_315_MOESM6_ESM.pdf]

Supplementary Information, Fig. S6.

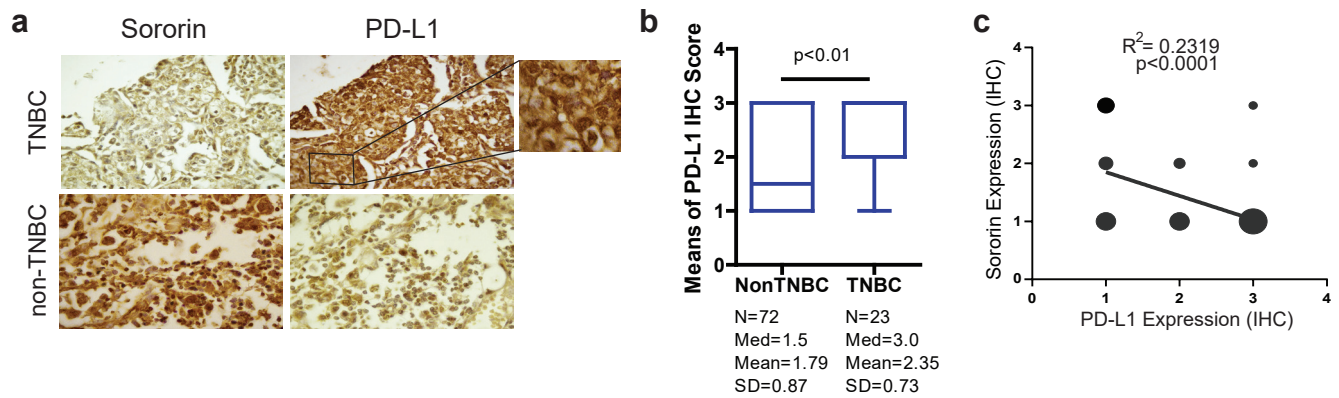

**Supplementary Information, Fig. S6. PD-L1 negatively correlated with Sororin in TNBC patient tumors.**

(a) Representative Immunohistochemistry (IHC) staining of PD-L1 and Sororin in the same region of a human breast cancer TMA. (b) Quantification of PD-L1 expression in non TNBC or TNBC primary breast cancer tissues. Box shows 25<sup>th</sup>-75<sup>th</sup> percentiles, as well as median (center line).  $P < 0.01$  by Student's *t*-test. (c) The correlation analysis of IHC scores (1, 2 and 3) of PD-L1 and Sororin using linear regression analysis. Dot size indicates the number of cases in this group.
