# Supplementary material for: Regulation of sister chromatid cohesion by nuclear PD-L1
Source: PubMed Central journal article supplement (PMC7343880; doi:10.1038/s41422-020-0315-8), 2020-04-29
Supplement: 41422_2020_315_MOESM7_ESM.pdf [file 41422_2020_315_MOESM7_ESM.pdf]

Supplementary Information, Fig. S7.

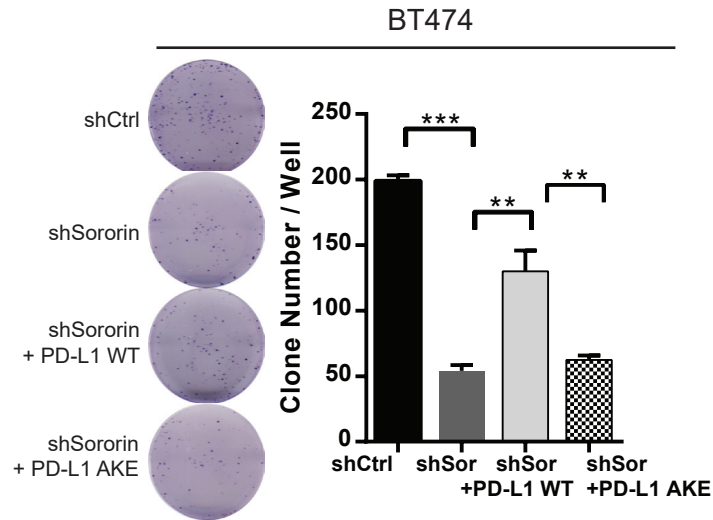

**Supplementary Information, Fig. S7. PD-L1 compensates for the loss of Sororin and regulates sister chromatid cohesion.**

Colony formation of BT474 cells expressing the indicated constructs. The experiment was repeated 3 independent times. \*\* $P < 0.01$ , \*\*\* $P < 0.001$  by Student's *t*-test.
